# Supplementary material for: A Novel Approach to Develop Lager Yeast with Higher NADH Availability to Improve the Flavor Stability of Industrial Beer
Source: MDPI journal article supplement (doi:10.3390/foods10123057), 2021-12-08
Supplement: s1 [file s1]

## Supplementary Materials

**Table S1.1.** NADH -NAD.

| No.     |        |       |       |       |       |       |       |       |       |       |
|---------|--------|-------|-------|-------|-------|-------|-------|-------|-------|-------|
| 1-10    | 0.32   | 0.259 | 0.236 | 0.299 | 0.278 | 0.247 | 0.313 | 0.194 | 0.281 | 0.204 |
| 11-20   | 0.154  | 0.28  | 0.168 | 0.231 | 0.204 | 0.251 | 0.261 | 0.265 | 0.213 | 0.22  |
| 21-30   | 0.169  | 0.292 | 0.179 | 0.174 | 0.272 | 0.329 | 0.223 | 0.227 | 0.279 | 0.278 |
| 31-40   | 0.242  | 0.276 | 0.228 | 0.315 | 0.327 | 0.17  | 0.165 | 0.28  | 0.27  | 0.242 |
| 41-50   | 0.175  | 0.168 | 0.179 | 0.31  | 0.26  | 0.187 | 0.288 | 0.23  | 0.319 | 0.319 |
| 51-60   | 0.24   | 0.249 | 0.308 | 0.164 | 0.312 | 0.277 | 0.26  | 0.235 | 0.214 | 0.176 |
| 61-70   | 0.181  | 0.16  | 0.208 | 0.289 | 0.183 | 0.226 | 0.298 | 0.238 | 0.279 | 0.288 |
| 71-80   | 0.169  | 0.232 | 0.312 | 0.24  | 0.232 | 0.27  | 0.262 | 0.169 | 0.289 | 0.18  |
| 81-90   | 0.297  | 0.264 | 0.316 | 0.303 | 0.255 | 0.199 | 0.32  | 0.264 | 0.221 | 0.303 |
| 91-100  | 0.185  | 0.179 | 0.208 | 0.192 | 0.271 | 0.162 | 0.225 | 0.27  | 0.156 | 0.166 |
| 101-110 | 0.188  | 0.242 | 0.221 | 0.185 | 0.267 | 0.198 | 0.271 | 0.189 | 0.189 | 0.296 |
| 111-120 | 0.276  | 0.173 | 0.222 | 0.316 | 0.258 | 0.215 | 0.322 | 0.213 | 0.23  | 0.169 |
| 121-130 | 0.15   | 0.177 | 0.206 | 0.233 | 0.181 | 0.239 | 0.273 | 0.159 | 0.205 | 0.213 |
| 131-140 | 0.185  | 0.208 | 0.187 | 0.251 | 0.193 | 0.296 | 0.175 | 0.248 | 0.17  | 0.309 |
| 141-150 | 0.2    | 0.247 | 0.313 | 0.298 | 0.313 | 0.237 | 0.313 | 0.3   | 0.323 | 0.184 |
| 151-160 | 0.1619 | 0.187 | 0.228 | 0.327 | 0.21  | 0.237 | 0.175 | 0.273 | 0.157 | 0.202 |
| 161-170 | 0.309  | 0.174 | 0.237 | 0.266 | 0.241 | 0.293 | 0.312 | 0.249 | 0.327 | 0.288 |
| 171-172 | 0.29   | 0.183 |       |       |       |       |       |       |       |       |
| YJ-002  | 0.18   |       |       |       |       |       |       |       |       |       |

**Table S1.2.** TBA Value.

| No.     |       |      |      |      |      |      |      |      |      |      |
|---------|-------|------|------|------|------|------|------|------|------|------|
| 1-10    | 0.41  | 0.39 | 0.75 | 0.33 | 0.58 | 0.42 | 0.61 | 0.49 | 0.43 | 0.24 |
| 11-20   |       | 0.77 |      | 0.59 | 0.35 | 0.37 | 0.35 | 0.43 | 0.41 | 0.57 |
| 21-30   |       | 0.67 |      |      | 0.68 | 0.57 | 0.64 | 0.31 | 0.46 | 0.51 |
| 31-40   | 0.49  | 0.57 | 0.29 | 0.27 | 0.33 |      |      | 0.71 | 0.33 | 0.38 |
| 41-50   |       |      |      | 0.73 | 0.63 | 0.26 | 0.49 | 0.43 | 0.45 | 0.48 |
| 51-60   | 0.62  | 0.34 | 0.53 |      | 0.75 | 0.70 | 0.41 | 0.70 | 0.63 |      |
| 61-70   | 0.66  |      | 0.35 | 0.52 | 0.49 | 0.33 | 0.26 | 0.29 | 0.62 | 0.39 |
| 71-80   |       | 0.54 | 0.43 | 0.36 | 0.31 | 0.66 | 0.32 |      | 0.65 | 0.28 |
| 81-90   | 0.51  | 0.51 | 0.73 | 0.62 | 0.65 | 0.60 | 0.67 | 0.56 | 0.41 | 0.56 |
| 91-100  | 0.30  |      | 0.39 | 0.66 | 0.33 |      | 0.23 | 0.36 |      |      |
| 101-110 | 0.28  | 0.33 | 0.52 | 0.51 | 0.62 | 0.26 | 0.68 | 0.71 | 0.34 | 0.56 |
| 111-120 | 0.72  |      | 0.61 | 0.56 | 0.49 | 0.73 | 0.55 | 0.22 | 0.31 |      |
| 121-130 |       |      | 0.52 | 0.76 | 0.38 | 0.51 | 0.39 |      | 0.35 | 0.47 |
| 131-140 | 0.39  | 0.41 | 0.54 | 0.28 | 0.33 | 0.58 |      | 0.25 |      | 0.72 |
| 141-150 | 0.48  | 0.69 | 0.43 | 0.34 | 0.29 | 0.36 | 0.51 | 0.38 | 0.37 | 0.33 |
| 151-160 |       | 0.73 | 0.40 | 0.29 | 0.30 | 0.63 |      | 0.40 |      | 0.72 |
| 161-170 | 0.68  |      | 0.75 | 0.64 | 0.39 | 0.35 | 0.34 | 0.66 | 0.43 |      |
| 171-172 | 0.28  | 0.36 |      |      |      |      |      |      |      |      |
| YJ-002  | 0.690 |      |      |      |      |      |      |      |      |      |

**Table S1.3.** Ethanol Content (%).

| No.  |     |      |  |      |  |  |  |  |      |  |
|------|-----|------|--|------|--|--|--|--|------|--|
| 1-10 | 5.1 | 4.33 |  | 4.56 |  |  |  |  | 5.11 |  |

|         |      |      |      |      |      |      |      |      |      |      |
|---------|------|------|------|------|------|------|------|------|------|------|
| 11-20   |      |      |      |      | 4.71 | 4.51 | 4.88 |      | 5.09 |      |
| 21-30   |      |      |      |      |      |      |      | 5.23 |      |      |
| 31-40   |      |      | 4.62 | 4.12 | 4.33 |      |      |      | 4.88 | 4.87 |
| 41-50   |      |      |      |      |      | 5.34 |      |      |      |      |
| 51-60   |      | 5.1  |      |      |      |      | 5.2  |      |      |      |
| 61-70   |      |      | 5.22 |      |      | 4.77 | 4.65 | 4.32 |      | 4.89 |
| 71-80   |      |      |      |      |      |      |      |      |      | 4.77 |
| 81-90   |      |      |      |      |      |      |      |      | 4.95 |      |
| 91-100  | 4.85 |      | 4.75 |      | 4.92 |      | 4.52 | 4.77 |      |      |
| 101-110 | 4.83 | 4.95 |      |      |      | 4.99 |      |      | 4.73 |      |
| 111-120 |      |      |      |      |      |      |      | 4.85 | 4.85 |      |
| 121-130 |      |      |      |      | 4.93 |      | 4.25 |      | 4.97 | 4.47 |
| 131-140 | 5.12 | 5.17 |      | 4.77 | 4.86 |      |      | 4.98 |      |      |
| 141-150 |      |      |      | 5.3  | 4.32 | 4.77 |      | 4.63 | 4.95 | 5.1  |
| 151-160 |      |      | 5.19 | 4.99 | 4.53 |      |      |      |      |      |
| 161-170 |      |      |      |      | 4.91 | 4.35 | 5.11 |      |      | 4.72 |
| 171-172 | 3.27 | 4.18 |      |      |      |      |      |      |      |      |
| YJ-002  | 5.13 |      |      |      |      |      |      |      |      |      |

**Table S1.4.** Diacetyl Content (mg·L<sup>-1</sup>).

| No.     |      |      |      |      |      |  |      |      |      |      |
|---------|------|------|------|------|------|--|------|------|------|------|
| 1-10    | 0.18 |      |      |      |      |  |      |      |      | 0.23 |
| 11-20   |      |      |      |      |      |  |      | 0.22 |      | 0.24 |
| 21-30   |      |      |      |      |      |  |      |      | 0.3  |      |
| 31-40   |      |      |      |      |      |  |      |      |      | 0.25 |
| 41-50   |      |      |      |      |      |  | 0.17 |      |      |      |
| 51-60   |      | 0.24 |      |      |      |  |      | 0.15 |      |      |
| 61-70   |      |      | 0.19 |      |      |  |      |      |      | 0.23 |
| 71-80   |      |      |      |      |      |  |      |      |      |      |
| 81-90   |      |      |      |      |      |  |      |      |      | 0.26 |
| 91-100  |      |      |      |      | 0.17 |  |      |      |      |      |
| 101-110 |      | 0.23 |      |      |      |  | 0.18 |      |      |      |
| 111-120 |      |      |      |      |      |  |      |      |      |      |
| 121-130 |      |      |      |      | 0.22 |  |      |      |      | 0.21 |
| 131-140 | 0.23 | 0.23 |      |      |      |  |      | 0.25 |      |      |
| 141-150 |      |      |      | 0.2  |      |  |      |      | 0.22 | 0.23 |
| 151-160 |      |      | 0.25 | 0.24 |      |  |      |      |      |      |
| 161-170 |      |      |      |      | 0.23 |  |      | 0.21 |      |      |
| 171-172 |      |      |      |      |      |  |      |      |      |      |
| YJ-002  | 0.21 |      |      |      |      |  |      |      |      |      |

**Table S2.1.** NADH-NAD.

| No.   |       |       |       |       |       |       |       |       |       |       |
|-------|-------|-------|-------|-------|-------|-------|-------|-------|-------|-------|
| 1-10  | 0.251 | 0.233 | 0.273 | 0.384 | 0.337 | 0.153 | 0.244 | 0.173 | 0.486 | 0.356 |
| 11-20 | 0.133 | 0.293 | 0.533 | 0.175 | 0.227 | 0.267 | 0.428 | 0.328 | 0.182 | 0.193 |
| 21-30 | 0.165 | 0.366 | 0.377 | 0.264 | 0.215 | 0.343 | 0.432 | 0.223 | 0.244 | 0.161 |
| 31-40 | 0.263 | 0.122 | 0.393 | 0.402 | 0.232 | 0.265 | 0.514 | 0.226 | 0.243 | 0.249 |
| M14   | 0.241 |       |       |       |       |       |       |       |       |       |

**Table S2.2.** TBA Value.

| No.   |      |      |      |      |     |      |      |      |      |      |
|-------|------|------|------|------|-----|------|------|------|------|------|
| 1-10  | 0.49 |      | 0.54 | 0.37 | 0.4 |      | 0.48 |      | 0.33 | 0.36 |
| 11-20 |      | 0.59 | 0.28 |      |     | 0.35 | 0.29 | 0.37 |      |      |
| 21-30 |      | 0.55 | 0.32 | 0.34 |     | 0.41 | 0.39 |      | 0.61 |      |
| 31-40 | 0.33 |      | 0.62 | 0.33 |     | 0.55 | 0.58 |      | 0.54 | 0.34 |
| M14   | 0.57 |      |      |      |     |      |      |      |      |      |

**Table S2.3.** Ethanol (%).

| No.   |      |      |  |      |      |      |      |  |      |      |
|-------|------|------|--|------|------|------|------|--|------|------|
| 1-10  |      |      |  | 4.49 |      |      |      |  | 5.12 | 4.91 |
| 11-20 |      | 4.85 |  |      | 4.35 | 4.69 | 4.78 |  |      |      |
| 21-30 |      | 4.87 |  | 4.58 |      | 4.77 |      |  |      |      |
| 31-40 | 4.22 |      |  | 4.92 |      |      |      |  |      | 3.78 |
| M14   | 4.83 |      |  |      |      |      |      |  |      |      |

**Table S2.4.** Diacyl.

| No.   |      |  |      |  |      |      |     |      |  |      |
|-------|------|--|------|--|------|------|-----|------|--|------|
| 1-10  |      |  |      |  |      |      |     | 0.11 |  | 0.13 |
| 11-20 |      |  | 0.12 |  |      | 0.11 | 0.1 |      |  |      |
| 21-30 |      |  | 0.11 |  | 0.13 | 0.12 |     |      |  |      |
| 31-40 |      |  |      |  | 0.11 |      |     |      |  |      |
| M14   | 0.13 |  |      |  |      |      |     |      |  |      |

**Table S2.5.** Acetaldehyde.

| No.   |       |  |       |  |       |      |      |      |  |      |
|-------|-------|--|-------|--|-------|------|------|------|--|------|
| 1-10  |       |  |       |  |       |      |      | 6.27 |  | 7.95 |
| 11-20 |       |  | 10.77 |  |       | 5.17 | 7.73 |      |  |      |
| 21-30 |       |  | 9.85  |  | 10.12 | 6.31 |      |      |  |      |
| 31-40 |       |  |       |  | 12.85 |      |      |      |  |      |
| M14   | 12.16 |  |       |  |       |      |      |      |  |      |
